# Supplementary material
Source: PubMed Central journal article supplement (PMC5971588)
Supplement: AAC.00301-18_zac006187196s1.pdf [file AAC.00301-18_zac006187196s1.pdf]

**A**

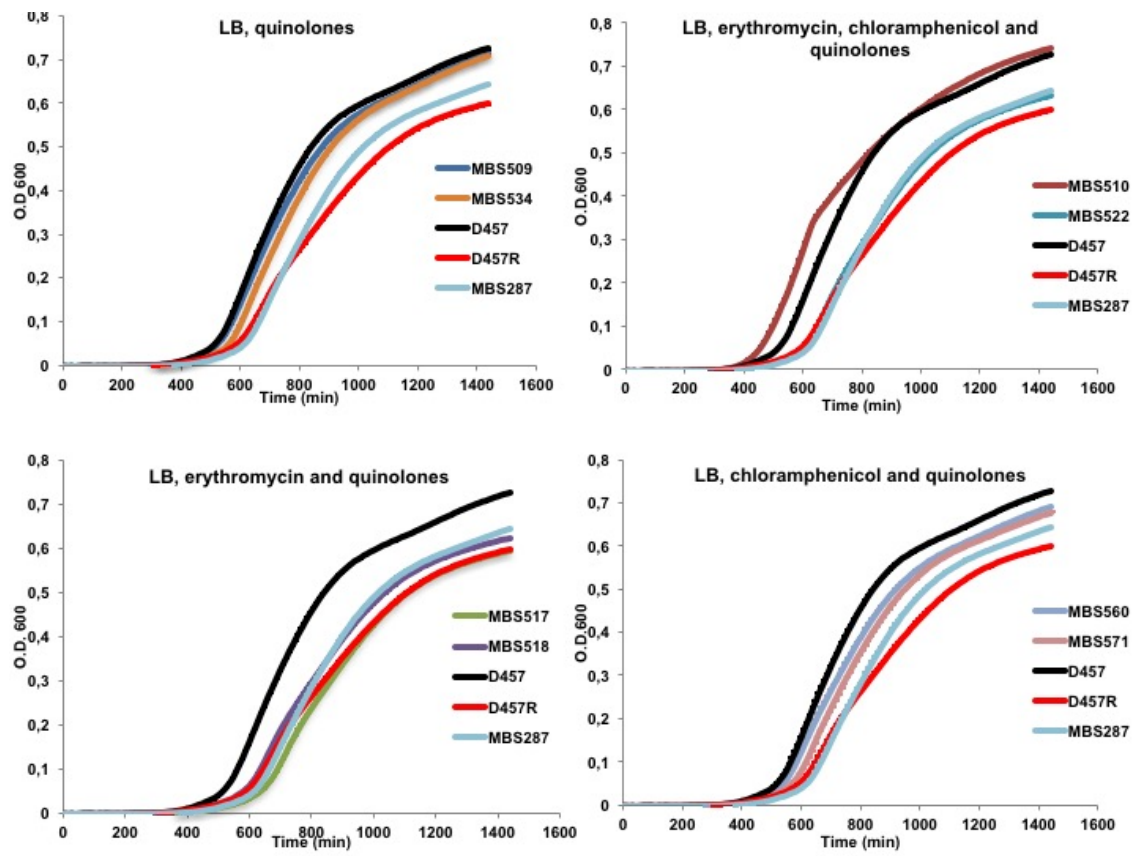

**B**

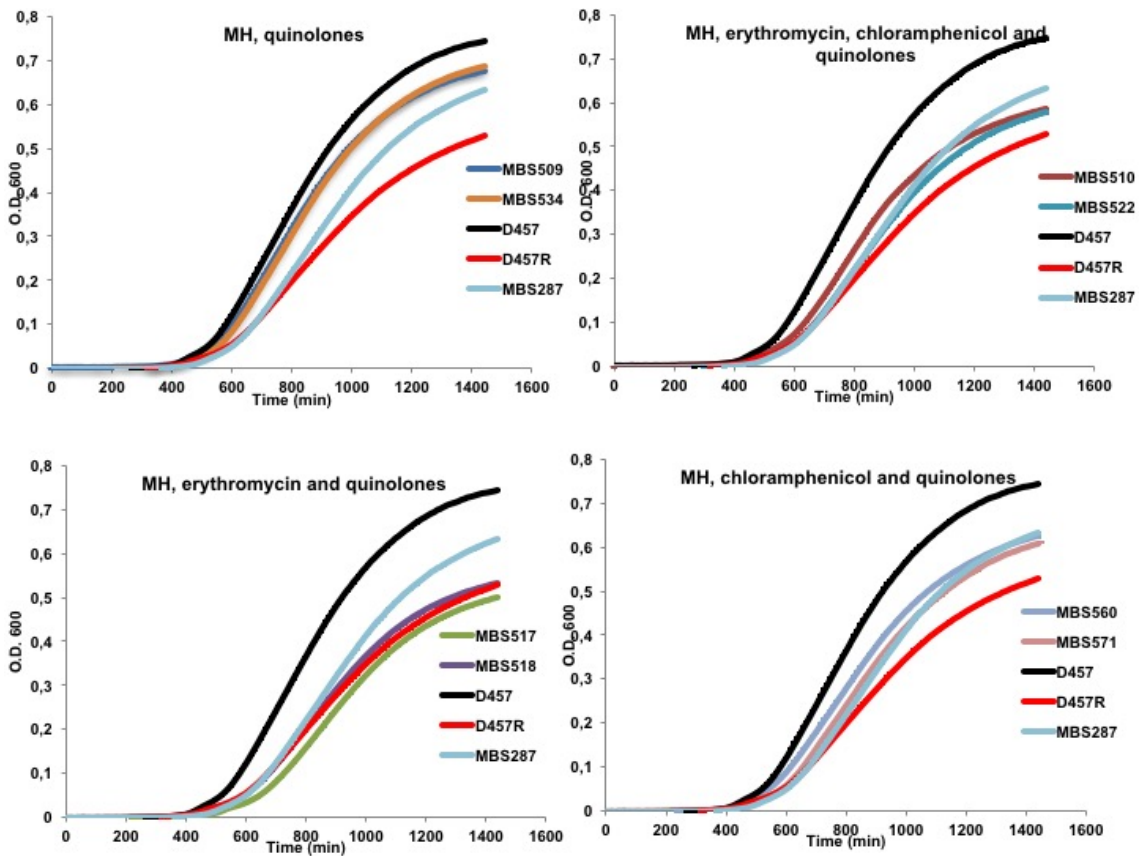

**Figure S1: Growth of selected mutants in comparison with the wild-type D457 strain.** The Figure shows the effect of the selected mutations on *S. maltophilia* growth. The mutants were grouped as a function of their phenotypes of resistance to either quinolones, erythromycin, chloramphenicol and quinolones, erythromycin and quinolones or chloramphenicol and quinolones. The wild-type D457 strain and its isogenic SmeDEF overproducer D457R were used as controls. Growth was measured using an Infinite M200 Tecan plate reader. As shown, all mutants presented an impaired growth in both LB (A) and MH (B) culture media.

**Table S1. Minimal inhibitory concentrations of different antibiotics for each *S. maltophilia* mutant isolated in the presence of different amount of cotrimoxazole**

| mg/L <sup>a</sup> | Strain        | Phenotype <sup>b</sup> | MIC (µg/ml) <sup>c</sup> |     |     |     |      |     |
|-------------------|---------------|------------------------|--------------------------|-----|-----|-----|------|-----|
|                   |               |                        | ERY                      | CHL | NOR | OFX | NAL  | CIP |
|                   | <b>D457</b>   |                        | 256                      | 16  | 8   | 2   | 16   | 2   |
|                   | <b>D457R</b>  |                        | 512                      | 128 | 64  | 16  | 128  | 16  |
| 2                 | <b>MBS509</b> | Q                      | 256                      | 16  | 64  | 8   | 128  | 8   |
| 2                 | <b>MBS510</b> | Q/CHL/ERY              | 512                      | 32  | 128 | 16  | 128  | 16  |
| 2                 | <b>MBS511</b> | Q/CHL                  | 256                      | 64  | 128 | 16  | >128 | 16  |
| 2                 | <b>MBS512</b> | Q/CHL                  | 256                      | 32  | 128 | 16  | 128  | 16  |
| 2                 | <b>MBS513</b> | Q/CHL                  | 256                      | 32  | 128 | 16  | 128  | 16  |
| 2                 | <b>MBS514</b> | Q/CHL                  | 256                      | 64  | 128 | 16  | 128  | 16  |
| 2                 | <b>MBS515</b> | Q/CHL                  | 256                      | 64  | 128 | 16  | >128 | 16  |
| 2                 | <b>MBS516</b> | Q/CHL                  | 256                      | 64  | 128 | 16  | >128 | 16  |
| 2                 | <b>MBS517</b> | Q/ERY                  | 512                      | 16  | 32  | 8   | 32   | 16  |
| 2                 | <b>MBS518</b> | Q/ERY                  | 512                      | 16  | 64  | 16  | 32   | 16  |
| 2                 | <b>MBS519</b> | Q/CHL                  | 256                      | 32  | 64  | 16  | 128  | 16  |
| 2                 | <b>MBS520</b> | Q/CHL/ERY              | 512                      | 32  | 64  | 16  | 32   | 16  |
| 2                 | <b>MBS521</b> | Q/CHL                  | 256                      | 32  | 64  | 16  | 128  | 16  |
| 2                 | <b>MBS522</b> | Q/CHL/ERY              | 512                      | 32  | 64  | 8   | 64   | 8   |
| 2                 | <b>MBS523</b> | Q                      | 256                      | 16  | 64  | 8   | 64   | 8   |
| 2                 | <b>MBS524</b> | Q/CHL                  | 256                      | 32  | 64  | 8   | 128  | 16  |
| 2                 | <b>MBS525</b> | Q/CHL                  | 256                      | 64  | 64  | 8   | 128  | 16  |
| 4                 | <b>MBS526</b> | Q/CHL                  | 256                      | 64  | 128 | 16  | >128 | 32  |
| 4                 | <b>MBS527</b> | Q/CHL                  | 256                      | 64  | 128 | 32  | >128 | 32  |
| 4                 | <b>MBS528</b> | Q/CHL                  | 256                      | 128 | 128 | 32  | >128 | 32  |
| 4                 | <b>MBS529</b> | Q/CHL                  | 256                      | 64  | 128 | 16  | >128 | 32  |
| 4                 | <b>MBS530</b> | Q/CHL                  | 256                      | 128 | 128 | 16  | >128 | 32  |
| 4                 | <b>MBS531</b> | Q/CHL                  | 256                      | 32  | 64  | 16  | 128  | 16  |
| 4                 | <b>MBS532</b> | Q/CHL                  | 256                      | 64  | 128 | 32  | >128 | 32  |
| 4                 | <b>MBS533</b> | Q/CHL                  | 256                      | 64  | 128 | 32  | >128 | 32  |
| 4                 | <b>MBS534</b> | Q                      | 256                      | 16  | 128 | 16  | >128 | 32  |
| 4                 | <b>MBS535</b> | Q/CHL                  | 256                      | 128 | 128 | 32  | >128 | 32  |
| 4                 | <b>MBS536</b> | Q/CHL                  | 256                      | 32  | 128 | 16  | 128  | 16  |
| 4                 | <b>MBS537</b> | Q/CHL                  | 256                      | 64  | 128 | 16  | >128 | 32  |
| 4                 | <b>MBS538</b> | Q/CHL                  | 256                      | 64  | 128 | 16  | >128 | 32  |
| 4                 | <b>MBS539</b> | Q/CHL                  | 256                      | 64  | 128 | 16  | >128 | 16  |
| 4                 | <b>MBS540</b> | Q/CHL                  | 256                      | 32  | 128 | 16  | >128 | 16  |
| 4                 | <b>MBS541</b> | Q/CHL                  | 256                      | 64  | 128 | 16  | 128  | 16  |
| 4                 | <b>MBS542</b> | Q/CHL                  | 256                      | 64  | 128 | 16  | >128 | 16  |
| 4                 | <b>MBS543</b> | Q/CHL                  | 256                      | 32  | 64  | 8   | 128  | 16  |
| 4                 | <b>MBS544</b> | Q/CHL                  | 256                      | 64  | 128 | 16  | >128 | 16  |
| 4                 | <b>MBS545</b> | Q/CHL                  | 256                      | 64  | 128 | 32  | >128 | 32  |

|    |               |       |     |     |      |    |      |    |
|----|---------------|-------|-----|-----|------|----|------|----|
| 4  | <b>MBS546</b> | Q/CHL | 256 | 64  | 128  | 16 | >128 | 32 |
| 4  | <b>MBS547</b> | Q/CHL | 256 | 64  | 128  | 16 | >128 | 32 |
| 4  | <b>MBS548</b> | Q/CHL | 256 | 64  | 128  | 32 | >128 | 32 |
| 4  | <b>MBS549</b> | Q/CHL | 256 | 64  | 128  | 32 | >128 | 32 |
| 4  | <b>MBS550</b> | Q/CHL | 256 | 64  | 128  | 16 | >128 | 32 |
| 4  | <b>MBS551</b> | Q/CHL | 256 | 64  | 128  | 16 | >128 | 32 |
| 4  | <b>MBS552</b> | Q/CHL | 256 | 64  | 64   | 8  | 128  | 8  |
| 4  | <b>MBS553</b> | Q/CHL | 256 | 32  | 128  | 16 | >128 | 16 |
| 4  | <b>MBS554</b> | Q/CHL | 256 | 64  | 128  | 16 | >128 | 16 |
| 4  | <b>MBS555</b> | Q/CHL | 256 | 32  | 128  | 16 | >128 | 32 |
| 8  | <b>MBS556</b> | Q/CHL | 256 | 64  | 128  | 32 | >128 | 32 |
| 8  | <b>MBS557</b> | Q/CHL | 256 | 128 | >128 | 32 | >128 | 32 |
| 8  | <b>MBS558</b> | Q/CHL | 256 | 64  | >128 | 32 | >128 | 32 |
| 8  | <b>MBS559</b> | Q/CHL | 256 | 64  | 128  | 16 | >128 | 32 |
| 8  | <b>MBS560</b> | Q/CHL | 256 | 64  | 128  | 32 | >128 | 32 |
| 8  | <b>MBS561</b> | Q/CHL | 256 | 128 | 128  | 16 | >128 | 32 |
| 8  | <b>MBS562</b> | Q/CHL | 256 | 64  | 128  | 16 | >128 | 32 |
| 8  | <b>MBS563</b> | Q/CHL | 256 | 128 | >128 | 32 | >128 | 32 |
| 8  | <b>MBS564</b> | Q/CHL | 256 | 128 | 128  | 16 | >128 | 32 |
| 8  | <b>MBS565</b> | Q/CHL | 256 | 64  | 128  | 16 | >128 | 32 |
| 8  | <b>MBS566</b> | Q/CHL | 256 | 64  | 128  | 16 | >128 | 32 |
| 8  | <b>MBS567</b> | Q/CHL | 256 | 128 | 128  | 32 | >128 | 32 |
| 8  | <b>MBS568</b> | Q/CHL | 256 | 32  | 128  | 16 | >128 | 32 |
| 16 | <b>MBS569</b> | Q/CHL | 256 | 128 | 128  | 32 | >128 | 32 |
| 16 | <b>MBS570</b> | Q/CHL | 256 | 64  | 128  | 32 | >128 | 32 |
| 16 | <b>MBS571</b> | Q/CHL | 256 | 128 | 128  | 32 | >128 | 32 |
| 16 | <b>MBS572</b> | Q     | 256 | 16  | 64   | 16 | 128  | 8  |
| 16 | <b>MBS573</b> | Q/CHL | 256 | 64  | 128  | 16 | >128 | 32 |
| 16 | <b>MBS574</b> | Q/CHL | 256 | 64  | 128  | 16 | >128 | 32 |
| 16 | <b>MBS575</b> | Q/CHL | 256 | 128 | >128 | 16 | >128 | 32 |
| 16 | <b>MBS576</b> | Q/CHL | 256 | 64  | 128  | 16 | >128 | 32 |
| 16 | <b>MBS577</b> | Q/CHL | 256 | 64  | 128  | 16 | >128 | 32 |
| 16 | <b>MBS578</b> | Q/CHL | 256 | 64  | 128  | 32 | >128 | 32 |
| 16 | <b>MBS579</b> | Q/CHL | 256 | 128 | >128 | 32 | >128 | 32 |
| 16 | <b>MBS580</b> | Q/CHL | 256 | 64  | 128  | 16 | >128 | 32 |
| 16 | <b>MBS581</b> | Q/CHL | 256 | 128 | >128 | 32 | >128 | 32 |
| 16 | <b>MBS582</b> | Q/CHL | 256 | 64  | 128  | 32 | >128 | 32 |
| 32 | <b>MBS583</b> | Q/CHL | 256 | 128 | 128  | 16 | >128 | 32 |
| 32 | <b>MBS584</b> | Q/CHL | 256 | 128 | 128  | 32 | >128 | 32 |
| 16 | <b>MBS585</b> | Q/CHL | 256 | 64  | 128  | 16 | >128 | 32 |
| 16 | <b>MBS586</b> | Q/CHL | 256 | 64  | 128  | 16 | >128 | 32 |
| 16 | <b>MBS587</b> | Q/CHL | 256 | 32  | 128  | 16 | 128  | 16 |
| 16 | <b>MBS588</b> | Q/CHL | 256 | 64  | 128  | 16 | >128 | 16 |
| 16 | <b>MBS590</b> | Q/CHL | 256 | 64  | 128  | 16 | >128 | 16 |

|    |               |       |     |    |      |    |      |    |
|----|---------------|-------|-----|----|------|----|------|----|
| 16 | <b>MBS591</b> | Q/CHL | 256 | 32 | 128  | 16 | >128 | 16 |
| 16 | <b>MBS592</b> | Q/CHL | 256 | 64 | 128  | 16 | >128 | 16 |
| 16 | <b>MBS593</b> | Q/CHL | 256 | 64 | 128  | 16 | >128 | 32 |
| 16 | <b>MBS594</b> | Q/CHL | 256 | 64 | 128  | 16 | >128 | 32 |
| 16 | <b>MBS595</b> | Q/CHL | 256 | 64 | 128  | 16 | >128 | 32 |
| 16 | <b>MBS596</b> | Q/CHL | 256 | 64 | 128  | 32 | >128 | 32 |
| 16 | <b>MBS597</b> | Q/CHL | 256 | 64 | >128 | 32 | >128 | 32 |
| 16 | <b>MBS598</b> | Q/CHL | 256 | 64 | 128  | 32 | >128 | 32 |
| 16 | <b>MBS599</b> | Q/CHL | 256 | 64 | 128  | 16 | >128 | 16 |
| 16 | <b>MBS600</b> | Q/CHL | 256 | 64 | 128  | 16 | >128 | 16 |
| 16 | <b>MBS601</b> | Q/CHL | 256 | 64 | 128  | 16 | >128 | 16 |
| 32 | <b>MBS602</b> | Q/CHL | 256 | 64 | 128  | 16 | >128 | 16 |

<sup>a</sup> Cotrimoxazole concentration used to isolate the mutant (data refer to trimethoprim concentration, being the trimethoprim/sulfamethoxazole rate1:5)

<sup>b</sup> antibiotic phenotype, Q, quinolones resistance; Q/CHL/ERY, quinolones, chloramphenicol and erythromycin resistant; Q/CHL, quinolones and chloramphenicol resistant; Q/ERY, quinolones and erythromycin resistant; <sup>c</sup> ERY, erythromycin; CHL, chloramphenicol; NOR, norfloxacin; OFX, ofloxacin; NAL, nalidixic acid; CIP, ciprofloxacin.
